# Supplementary material
Source: Elsevier journal article supplement (https://www.sciencedirect.com/science/article/pii/S021446031930049X)
Supplement: mmc1 [file S021446031930049X:mmc1.docx]

## Anexo I

Cuestionario de bilingüismo

Fecha_____________________________________________________

Nombre: __________________________________________________

Correo electrónico: _________________________________________

Teléfono: _________________________________________________

1. Edad: __________

2. Sexo: Masculino / Femenino

3. Lugar de nacimiento:

( ) Querétaro

( ) CDMX

( ) Otro ________________________________________

4. Marca los idiomas que conoces

( ) LSM

( ) Español oral

( ) Español escrito

( ) Inglés oral

( ) Inglés escrito

( ) ASL

( ) Otro

5. Escribe el nombre y el lugar donde aprendiste los siguientes idiomas:

| Idioma | Edad | Lugar (escuela, terapia, casa) |
| --- | --- | --- |
| LSM |  |  |
| Español escrito |  |  |
| Español oral |  |  |
| Inglés escrito |  |  |
| Inglés oral |  |  |
| ASL |  |  |

6. ¿En qué idioma siente que generalmente se comunica mejor o se siente más cómodo? Escriba el nombre del idioma en cada condición.

|  | En la casa | Trabajo/Escuela | Otros |
| --- | --- | --- | --- |
| Hablar |  |  |  |
| Leer |  |  |  |
| Escribir |  |  |  |

Sobre la familia

7. Educación (marque con una cruz el grado mayor obtenido o el más alto nivel de educación de tu madre):

___________ Escuela Primaria/Elemental (de 6 a 12 años)

___________ Escuela Media (de 13 a 15 años)

___________ Escuela Secundaria (de 16 a 18 años)

___________ Carrera en la Universidad (ej. Licenciatura, Ingeniería)

___________ Posgrado (Maestría)

___________ Posgrado (Doctorado)

Otro (especifique): ___________

8. Educación (marque con una cruz el grado mayor obtenido o el más alto nivel de educación de tu padre):

___________ Escuela Primaria/Elemental (de 6 a 12 años)

___________ Escuela Media (de 13 a 15 años)

___________ Escuela Secundaria (de 16 a 18 años)

___________ Carrera en la Universidad (ej. Licenciatura, Ingeniería)

___________ Posgrado (Maestría)

___________ Posgrado (Doctorado)

Otro (especifique): ___________

9. ¿Qué idioma hablas con….?

Mamá __________________________

Papá __________________________

Hermanos __________________________

Pareja __________________________

Amigos__________________________

Abuelos _________________________

Tíos ____________________________

Primos ______________________________

Otro _____________________________

10. En tu familia, ¿Hay otros Sordos usuarios de LSM?

 Papá __________________________

Hermanos __________________________

Pareja __________________________

Amigos__________________________

Abuelos _________________________

Tíos ____________________________

Primos ______________________________

Otro _______________________________
